# Supplementary material
Source: publisher site journal article supplement (https://www.dovepress.com/article/482510)
Supplement: Supplementary file 1 [file get_supplementary_file.php]

Supplementary Table 1. List of metabolites that differed significantly in hippocampus, cortex, liver, heart, intestine, serum, lung, kidney and stomach samples from mice after Corilagin treatment.

| Metabolite | HMDB ID | Intestine | | |  | Lung | | |  | Kidney | | |  | Stomach | | |  | Heart | | |  | Liver | | |  | Hippocampus | | |  | Cortex | | |  | Serum | | |
| --- | --- | --- | --- | --- | --- | --- | --- | --- | --- | --- | --- | --- | --- | --- | --- | --- | --- | --- | --- | --- | --- | --- | --- | --- | --- | --- | --- | --- | --- | --- | --- | --- | --- | --- | --- | --- |
|  |  | VIP | p-value | Trend |  | VIP | p-value | Trend |  | VIP | p-value | Trend |  | VIP | p-value | Trend |  | VIP | p-value | Trend |  | VIP | p-value | Trend |  | VIP | p-value | Trend |  | VIP | p-value | Trend |  | VIP | p-value | Trend |
| 2-Phenylbutyric acid | HMDB00329 |  |  |  |  |  |  |  |  | 3.024 | 0 | ↓ |  |  |  |  |  |  |  |  |  |  |  |  |  |  |  |  |  |  |  |  |  |  |  |  |
| 5-Aminopentanoic acid | HMDB0003355 |  |  |  |  |  |  |  |  |  |  |  |  |  |  |  |  |  |  |  |  |  |  |  |  |  |  |  |  |  |  |  |  | 2.054 | 0.002 | ↓ |
| 9-Hydroxybenzo[a]pyrene | HMDB0062438 |  |  |  |  |  |  |  |  |  |  |  |  |  |  |  |  |  |  |  |  | 1.736 | 0 | ↓ |  |  |  |  |  |  |  |  |  |  |  |  |
| Adenosine | HMDB0000050 |  |  |  |  |  |  |  |  |  |  |  |  |  |  |  |  | 2.372 | 0 | ↑ |  |  |  |  |  |  |  |  |  | 3.890 | 0 | ↑ |  |  |  |  |
| Arachidonic acid | HMDB0001043 |  |  |  |  |  |  |  |  |  |  |  |  |  |  |  |  |  |  |  |  |  |  |  |  |  |  |  |  |  |  |  |  | 1.369 | 0.001 | ↑ |
| Beta-Alanine | HMDB0000056 |  |  |  |  |  |  |  |  | 1.169 | 0.046 | ↓ |  |  |  |  |  |  |  |  |  |  |  |  |  |  |  |  |  |  |  |  |  |  |  |  |
| Cholesterol | HMDB0000067 | 1.071 | 0.001 | ↓ |  |  |  |  |  |  |  |  |  |  |  |  |  |  |  |  |  |  |  |  |  |  |  |  |  |  |  |  |  |  |  |  |
| Cinnamic acid | HMDB0000567 |  |  |  |  |  |  |  |  | 1.321 | 0.016 | ↑ |  |  |  |  |  |  |  |  |  |  |  |  |  |  |  |  |  |  |  |  |  |  |  |  |
| Citric acid | HMDB0000094 |  |  |  |  |  |  |  |  |  |  |  |  |  |  |  |  |  |  |  |  |  |  |  |  | 1.563 | 0.028 | ↓ |  | 2.701 | 0 | ↓ |  |  |  |  |
| D-Arabinose | HMDB0029942 |  |  |  |  |  |  |  |  |  |  |  |  |  |  |  |  |  |  |  |  | 2.100 | 0 | ↓ |  |  |  |  |  |  |  |  |  |  |  |  |
| D-Glucose | HMDB0000122 |  |  |  |  |  |  |  |  |  |  |  |  |  |  |  |  |  |  |  |  |  |  |  |  |  |  |  |  |  |  |  |  | 1.789 | 0 | ↓ |
| DL-2-Aminooctanoic acid | HMDB0000991 |  |  |  |  |  |  |  |  |  |  |  |  |  |  |  |  |  |  |  |  |  |  |  |  |  |  |  |  |  |  |  |  | 1.446 | 0.001 | ↓ |
| Docosahexaenoic acid | HMDB0002183 | 1.529 | 0.014 | ↓ |  |  |  |  |  |  |  |  |  |  |  |  |  |  |  |  |  |  |  |  |  | 1.074 | 0.008 | ↓ |  |  |  |  |  |  |  |  |
| Ethanolamine | HMDB0000149 |  |  |  |  |  |  |  |  | 2.448 | 0.028 | ↓ |  |  |  |  |  |  |  |  |  |  |  |  |  |  |  |  |  | 1.672 | 0 | ↓ |  |  |  |  |
| Gamma-Aminobutyric acid | HMDB0000112 |  |  |  |  |  |  |  |  |  |  |  |  |  |  |  |  |  |  |  |  |  |  |  |  |  |  |  |  | 1.633 | 0 | ↓ |  |  |  |  |
| Gluconic acid | HMDB0000625 |  |  |  |  |  |  |  |  |  |  |  |  |  |  |  |  |  |  |  |  | 2.258 | 0 | ↓ |  |  |  |  |  |  |  |  |  |  |  |  |
| Glyceric acid | HMDB0000139 |  |  |  |  |  |  |  |  |  |  |  |  |  |  |  |  |  |  |  |  | 1.127 | 0.001 | ↑ |  |  |  |  |  |  |  |  |  | 1.489 | 0.001 | ↑ |
| Glycerol | HMDB0000131 |  |  |  |  | 1.356 | 0.001 | ↓ |  |  |  |  |  |  |  |  |  |  |  |  |  |  |  |  |  |  |  |  |  | 1.023 | 0.002 | ↓ |  |  |  |  |
| Glycine | HMDB0000123 | 1.462 | 0.001 | ↓ |  |  |  |  |  |  |  |  |  |  |  |  |  |  |  |  |  |  |  |  |  |  |  |  |  | 1.009 | 0.007 | ↓ |  |  |  |  |
| Guanosine | HMDB0000133 |  |  |  |  |  |  |  |  |  |  |  |  |  |  |  |  |  |  |  |  | 1.530 | 0 | ↓ |  | 1.388 | 0.047 | ↓ |  |  |  |  |  |  |  |  |
| Hypoxanthine | HMDB0000157 | 2.185 | 0 | ↓ |  | 1.517 | 0.028 | ↑ |  |  |  |  |  |  |  |  |  |  |  |  |  |  |  |  |  |  |  |  |  |  |  |  |  |  |  |  |
| Inosine | HMDB0000195 |  |  |  |  |  |  |  |  |  |  |  |  |  |  |  |  | 1.913 | 0.005 | ↑ |  |  |  |  |  | 1.242 | 0.022 | ↑ |  | 1.973 | 0.001 | ↑ |  |  |  |  |
| Lactose | HMDB0041627 |  |  |  |  |  |  |  |  |  |  |  |  |  |  |  |  |  |  |  |  |  |  |  |  | 1.316 | 0.010 | ↑ |  |  |  |  |  |  |  |  |
| L-Alanine | HMDB0000161 |  |  |  |  |  |  |  |  |  |  |  |  |  |  |  |  |  |  |  |  |  |  |  |  |  |  |  |  |  |  |  |  | 1.355 | 0 | ↓ |
| L-Arabitol | HMDB0001851 |  |  |  |  |  |  |  |  |  |  |  |  |  |  |  |  | 2.136 | 0.001 | ↓ |  | 1.727 | 0 | ↑ |  |  |  |  |  |  |  |  |  |  |  |  |
| L-Aspartic acid | HMDB0000191 | 1.411 | 0.006 | ↓ |  | 1.270 | 0.006 | ↓ |  |  |  |  |  | 1.712 | 0.034 | ↑ |  |  |  |  |  |  |  |  |  | 2.282 | 0 | ↓ |  | 1.980 | 0 | ↓ |  |  |  |  |
| L-Cysteine | HMDB0000574 |  |  |  |  |  |  |  |  |  |  |  |  | 1.437 | 0.014 | ↑ |  |  |  |  |  | 1.043 | 0.005 | ↓ |  |  |  |  |  |  |  |  |  |  |  |  |
| L-Galactose | HMDB0033704 |  |  |  |  |  |  |  |  |  |  |  |  |  |  |  |  |  |  |  |  | 2.115 | 0 | ↓ |  |  |  |  |  |  |  |  |  |  |  |  |
| L-Glutamic acid | HMDB0000148 | 1.700 | 0 | ↓ |  |  |  |  |  |  |  |  |  |  |  |  |  |  |  |  |  |  |  |  |  |  |  |  |  | 1.977 | 0.003 | ↑ |  | 1.366 | 0.002 | ↓ |
| L-Isoleucine | HMDB0000172 | 1.336 | 0.011 | ↓ |  |  |  |  |  |  |  |  |  |  |  |  |  |  |  |  |  |  |  |  |  |  |  |  |  | 1.463 | 0.004 | ↓ |  |  |  |  |
| L-Lactic acid | HMDB0000190 | 1.748 | 0.002 | ↓ |  |  |  |  |  |  |  |  |  |  |  |  |  |  |  |  |  |  |  |  |  | 1.565 | 0.010 | ↑ |  |  |  |  |  |  |  |  |
| L-Leucine | HMDB0000687 | 1.372 | 0.011 | ↓ |  |  |  |  |  |  |  |  |  |  |  |  |  |  |  |  |  |  |  |  |  |  |  |  |  |  |  |  |  |  |  |  |
| L-Lysine | HMDB0000182 |  |  |  |  | 1.746 | 0.001 | ↓ |  | 1.581 | 0.017 | ↓ |  |  |  |  |  | 2.033 | 0.002 | ↓ |  | 1.315 | 0 | ↓ |  |  |  |  |  |  |  |  |  | 1.232 | 0.010 | ↓ |
| L-Methionine | HMDB0000696 | 1.538 | 0.002 | ↓ |  |  |  |  |  |  |  |  |  |  |  |  |  | 2.086 | 0.001 | ↓ |  |  |  |  |  |  |  |  |  |  |  |  |  | 1.930 | 0 | ↓ |
| L-Phenylalanine | HMDB0000159 | 1.572 | 0.003 | ↓ |  |  |  |  |  |  |  |  |  |  |  |  |  | 1.598 | 0.028 | ↑ |  |  |  |  |  | 1.347 | 0.019 | ↓ |  |  |  |  |  |  |  |  |
| L-Proline | HMDB0000162 |  |  |  |  |  |  |  |  |  |  |  |  |  |  |  |  |  |  |  |  |  |  |  |  | 1.570 | 0.009 | ↑ |  |  |  |  |  | 1.471 | 0 | ↓ |
| L-Threonine | HMDB0000167 | 1.334 | 0.004 | ↓ |  |  |  |  |  |  |  |  |  |  |  |  |  | 1.271 | 0.090 | ↓ |  |  |  |  |  |  |  |  |  |  |  |  |  | 1.642 | 0 | ↓ |
| L-Tryptophan | HMDB0000929 |  |  |  |  |  |  |  |  |  |  |  |  |  |  |  |  |  |  |  |  |  |  |  |  |  |  |  |  |  |  |  |  | 1.443 | 0.001 | ↓ |
| L-Tyrosine | HMDB0000158 | 1.549 | 0.002 | ↓ |  |  |  |  |  |  |  |  |  |  |  |  |  |  |  |  |  | 1.153 | 0 | ↓ |  |  |  |  |  | 1.204 | 0.018 | ↓ |  | 1.778 | 0 | ↓ |
| L-Valine | HMDB0000883 | 1.273 | 0.011 | ↓ |  |  |  |  |  |  |  |  |  |  |  |  |  |  |  |  |  |  |  |  |  | 1.153 | 0.031 | ↑ |  | 1.050 | 0.027 | ↓ |  |  |  |  |
| Maleic acid | HMDB0000176 |  |  |  |  |  |  |  |  | 2.274 | 0 | ↑ |  |  |  |  |  |  |  |  |  |  |  |  |  |  |  |  |  | 1.657 | 0.001 | ↑ |  |  |  |  |
| Malic acid | HMDB0000156 | 1.481 | 0.002 | ↓ |  | 2.607 | 0 | ↓ |  |  |  |  |  |  |  |  |  | 1.566 | 0.030 | ↓ |  | 1.266 | 0.001 | ↓ |  |  |  |  |  |  |  |  |  | 1.912 | 0.001 | ↓ |
| Mannitol | HMDB0000765 |  |  |  |  |  |  |  |  |  |  |  |  | 2.402 | 0.001 | ↓ |  |  |  |  |  |  |  |  |  |  |  |  |  |  |  |  |  |  |  |  |
| MG(0:0/18:0/0:0) | HMDB0011535 |  |  |  |  | 1.768 | 0 | ↓ |  | 1.496 | 0 | ↓ |  |  |  |  |  | 1.344 | 0.038 | ↓ |  | 1.030 | 0 | ↓ |  | 1.032 | 0.004 | ↓ |  |  |  |  |  |  |  |  |
| MG(16:0/0:0/0:0) | HMDB0011564 |  |  |  |  | 1.997 | 0 | ↓ |  | 1.772 | 0 | ↓ |  |  |  |  |  | 1.873 | 0.011 | ↓ |  |  |  |  |  |  |  |  |  |  |  |  |  |  |  |  |
| muco-Inositol | HMDB0062138 |  |  |  |  |  |  |  |  | 3.722 | 0 | ↓ |  |  |  |  |  |  |  |  |  |  |  |  |  |  |  |  |  |  |  |  |  |  |  |  |
| myo-Inositol | HMDB0000211 |  |  |  |  |  |  |  |  | 1.194 | 0.029 | ↑ |  |  |  |  |  | 1.774 | 0.003 | ↑ |  |  |  |  |  |  |  |  |  |  |  |  |  |  |  |  |
| Myristic acid | HMDB0000806 |  |  |  |  |  |  |  |  |  |  |  |  |  |  |  |  | 1.030 | 0.216 | ↓ |  |  |  |  |  |  |  |  |  |  |  |  |  |  |  |  |
| Naphthalene | HMDB0029751 |  |  |  |  |  |  |  |  |  |  |  |  |  |  |  |  |  |  |  |  | 2.415 | 0 | ↑ |  |  |  |  |  |  |  |  |  |  |  |  |
| O-Phosphoethanolamine | HMDB0000224 | 1.604 | 0 | ↓ |  | 2.594 | 0 | ↓ |  |  |  |  |  | 2.095 | 0.028 | ↓ |  | 1.304 | 0.038 | ↓ |  |  |  |  |  |  |  |  |  | 1.701 | 0 | ↓ |  |  |  |  |
| Ornithine | HMDB0000214 |  |  |  |  |  |  |  |  |  |  |  |  |  |  |  |  |  |  |  |  | 1.338 | 0 | ↓ |  |  |  |  |  |  |  |  |  | 1.565 | 0 | ↓ |
| Palmitic acid | HMDB0000220 |  |  |  |  |  |  |  |  |  |  |  |  |  |  |  |  | 2.060 | 0.003 | ↓ |  |  |  |  |  |  |  |  |  |  |  |  |  |  |  |  |
| Palmitoleic acid | HMDB0003229 |  |  |  |  |  |  |  |  |  |  |  |  |  |  |  |  | 2.142 | 0.002 | ↑ |  |  |  |  |  |  |  |  |  |  |  |  |  |  |  |  |
| Putrescine | HMDB0001414 |  |  |  |  |  |  |  |  |  |  |  |  |  |  |  |  |  |  |  |  |  |  |  |  |  |  |  |  |  |  |  |  | 1.963 | 0 | ↓ |
| Pyroglutamic acid | HMDB0000267 | 1.699 | 0.001 | ↓ |  |  |  |  |  |  |  |  |  |  |  |  |  | 1.090 | 0.152 | ↑ |  |  |  |  |  |  |  |  |  |  |  |  |  |  |  |  |
| Ribitol | HMDB0000508 |  |  |  |  |  |  |  |  |  |  |  |  |  |  |  |  |  |  |  |  | 1.255 | 0.002 | ↓ |  |  |  |  |  |  |  |  |  |  |  |  |
| Ribothymidine | HMDB0000884 |  |  |  |  |  |  |  |  |  |  |  |  |  |  |  |  |  |  |  |  | 1.396 | 0 | ↓ |  |  |  |  |  |  |  |  |  |  |  |  |
| scyllo-Inositol | HMDB0006088 | 1.322 | 0.002 | ↓ |  | 1.607 | 0.008 | ↓ |  |  |  |  |  |  |  |  |  |  |  |  |  |  |  |  |  | 1.222 | 0.013 | ↓ |  |  |  |  |  |  |  |  |
| Serine | HMDB0062263 | 1.454 | 0.003 | ↓ |  |  |  |  |  |  |  |  |  | 1.698 | 0.016 | ↑ |  |  |  |  |  | 1.373 | 0 | ↓ |  | 1.227 | 0.001 | ↓ |  |  |  |  |  |  |  |  |
| Sorbitol | HMDB0000247 |  |  |  |  |  |  |  |  |  |  |  |  | 2.604 | 0.005 | ↓ |  |  |  |  |  |  |  |  |  |  |  |  |  |  |  |  |  |  |  |  |
| Succinic acid | HMDB0000254 |  |  |  |  |  |  |  |  |  |  |  |  |  |  |  |  |  |  |  |  | 1.247 | 0.003 | ↑ |  |  |  |  |  |  |  |  |  |  |  |  |
| Sucrose | HMDB0000258 |  |  |  |  |  |  |  |  |  |  |  |  | 2.631 | 0.004 | ↓ |  |  |  |  |  |  |  |  |  |  |  |  |  |  |  |  |  |  |  |  |
| Uracil | HMDB0000300 |  |  |  |  |  |  |  |  |  |  |  |  |  |  |  |  |  |  |  |  | 1.257 | 0 | ↑ |  | 1.143 | 0.009 | ↑ |  | 1.686 | 0 | ↓ |  |  |  |  |
| Xanthine | HMDB0000292 | 1.589 | 0.019 | ↓ |  |  |  |  |  |  |  |  |  |  |  |  |  |  |  |  |  |  |  |  |  |  |  |  |  |  |  |  |  |  |  |  |

Notes: The upward arrow indicates that the level of metabolites in the Corilagin-exposed group was up-regulated compared to the control group. The downward arrow indicates that the level of metabolites in the Corilagin-exposed group was lower than that in the control group.
